# Supplementary material for: Enhanced visible light photoelectrocatalytic activity over CuxZn1−xIn2S4@TiO2 nanotube array hetero-structures
Source: Royal Society of Chemistry journal article supplement (doi:10.1039/c6ta07420k), 2016-12-07
Supplement: c6ta07420k1.pdf [file c6ta07420k1.pdf]

## Supplementary Information

### Enhanced visible light photoelectrocatalytic activity over $\text{Cu}_x\text{Zn}_{1-x}$

#### $\text{InS@TiO}_2$ nanotube array hetero-structure

Zhi Wu, Cheng Gong, Jiangdong Yu, Lan Sun,\* Wang Xiao and Changjian Lin\*

State Key Laboratory for Physical Chemistry of Solid Surfaces, Department of Chemistry, College of Chemistry and Chemical Engineering, Xiamen University, Xiamen 361005, China

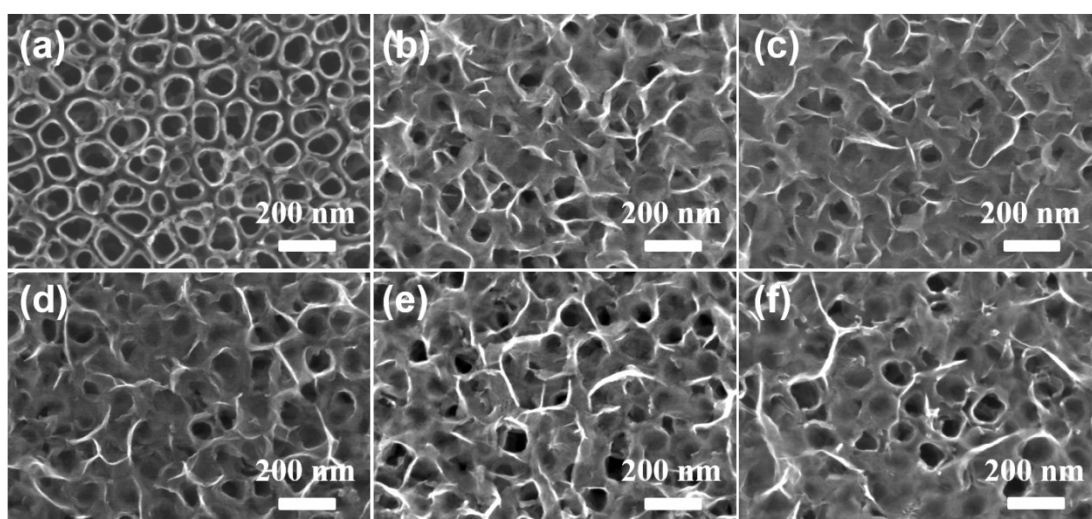

**Figure S1** SEM images of (a) TNTAs, (b) CZIST-0, (c) CZIST-1/12, (d) CZIST-1/8, (e) CZIST-1/4, (f) CZIST-1/2.

---

\*Corresponding author. Tel.: +86 592 2184655; fax: +86 592 2186657.

*E-mail address:* [cjlin@xmu.edu.cn](mailto:cjlin@xmu.edu.cn) (C. J. Lin) and [sunlan@xmu.edu.cn](mailto:sunlan@xmu.edu.cn) (L. Sun)

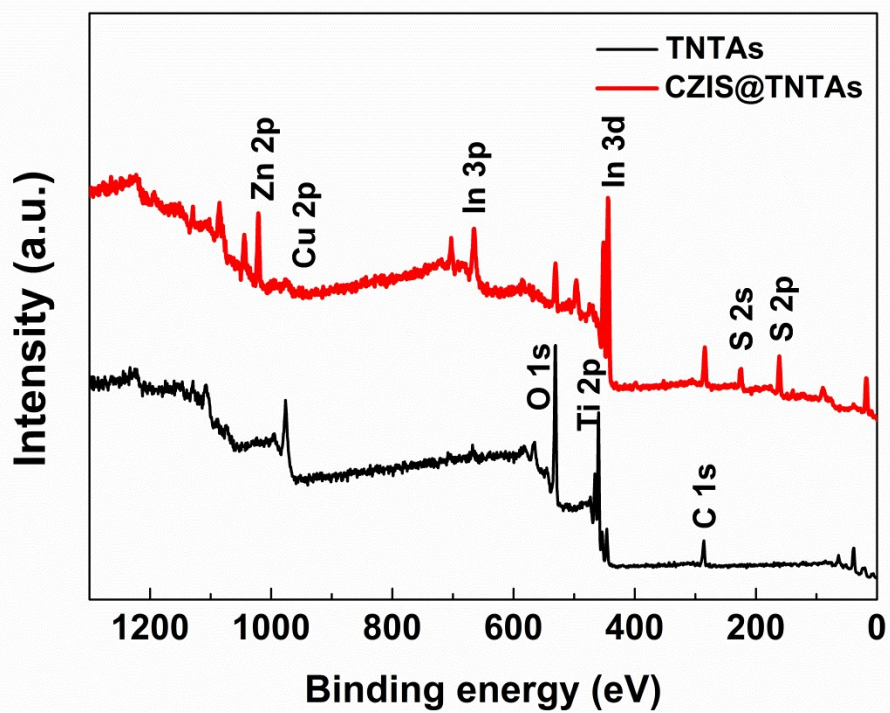

**Figure S2** Survey XPS spectra of TNTAs and CZIS@TNTAs.

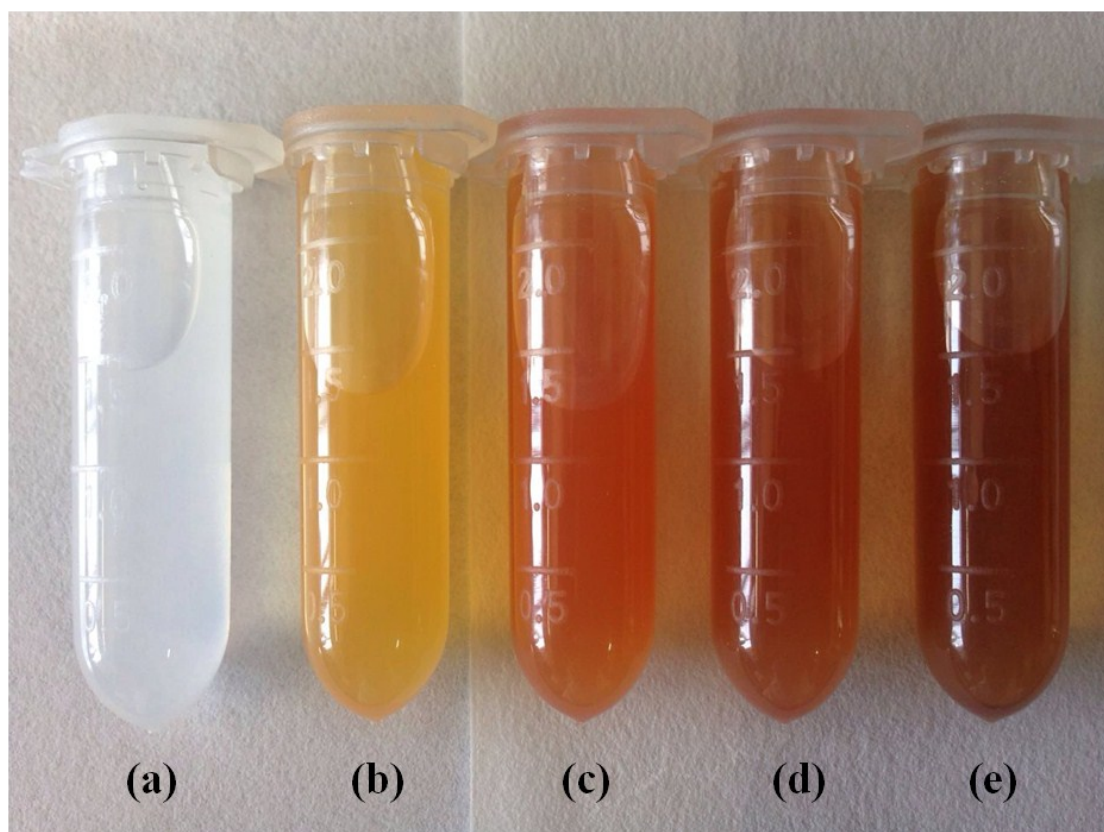

**Figure S3** The digital photograph of triethylene glycol solution of different heterosystems before solvothermal reaction: (a) CZIST-0, (b) CZIST-1/12, (c) CZIST-1/8, (d) CZIST-1/4, (e) CZIST-1/2.

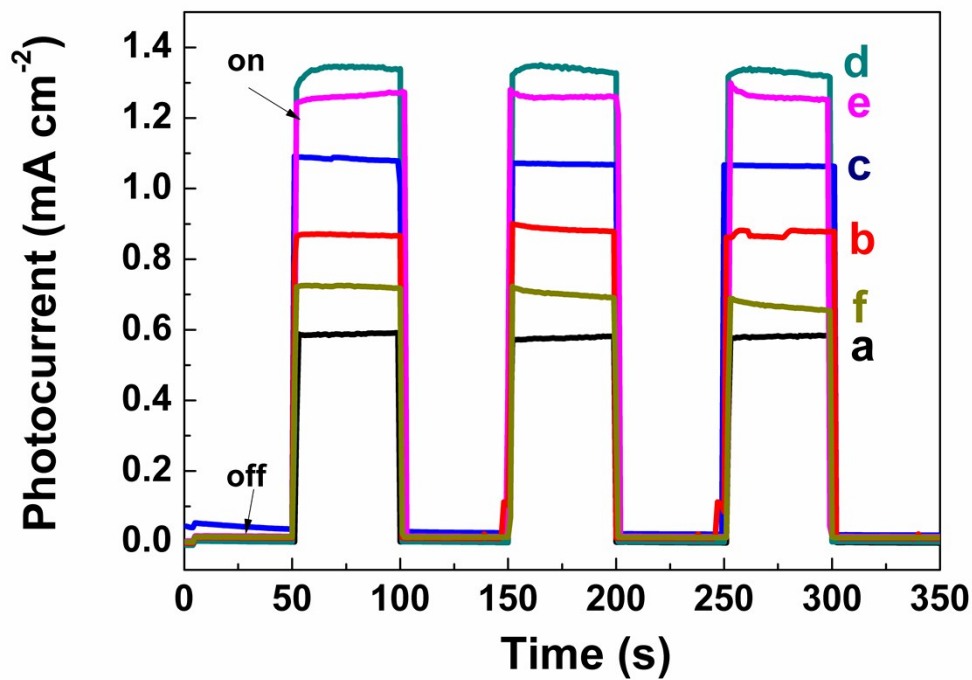

**Figure S4** Photocurrent responses of TNTAs (line a) and CZIS@TNTAs with different mole ratio of Cu and Zn from 0 to 1/2 (line b to f) in a mixing solution of 0.5 M Na<sub>2</sub>SO<sub>3</sub> and 0.5 M Na<sub>2</sub>S in a photoelectrochemical (PEC) cell at a 0 V bias vs. Ag/AgCl electrode with a pulse of 50 s under intermittent Xe lamp irradiation.

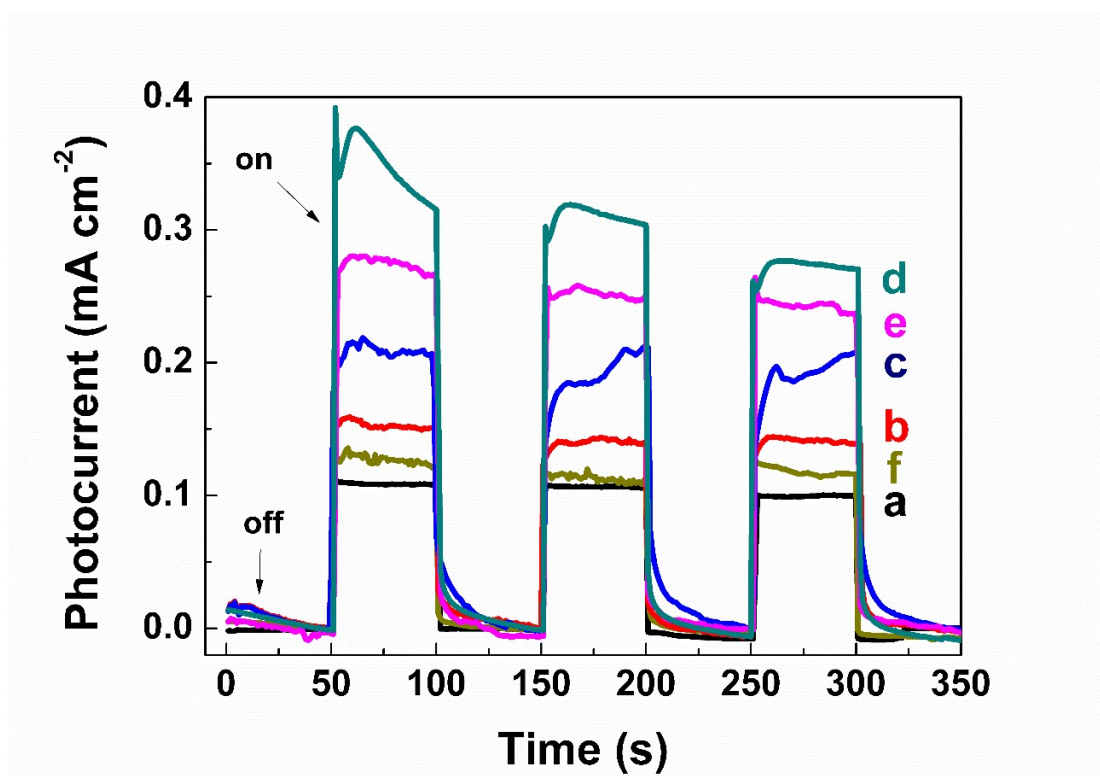

**Figure S5** Photocurrent responses of TNTAs (line a) and CZIS with different mole ratio of Cu and Zn from 0 to 1/2 (line b to f) in a mixing solution of 0.5 M Na<sub>2</sub>SO<sub>3</sub> and 0.5 M Na<sub>2</sub>S in a photoelectrochemical (PEC) cell at a 0 V bias vs. Ag/AgCl electrode with a pulse of 50 s under visible light irradiation.
